# Supplementary material
Source: Springer Nature journal article supplement (https://www.springermedizin.de/resource/supplementary/13030_2007_11_MOESM1_ESM.pdf/9644540)

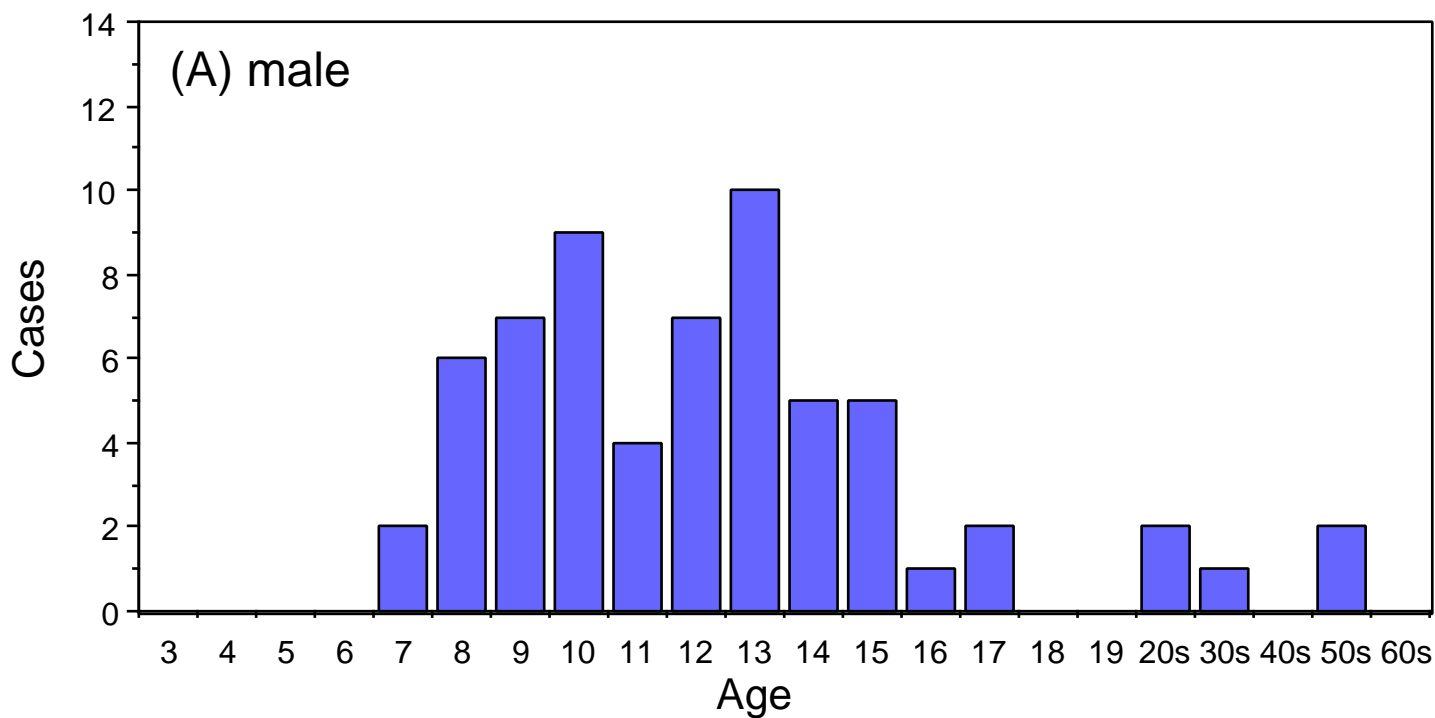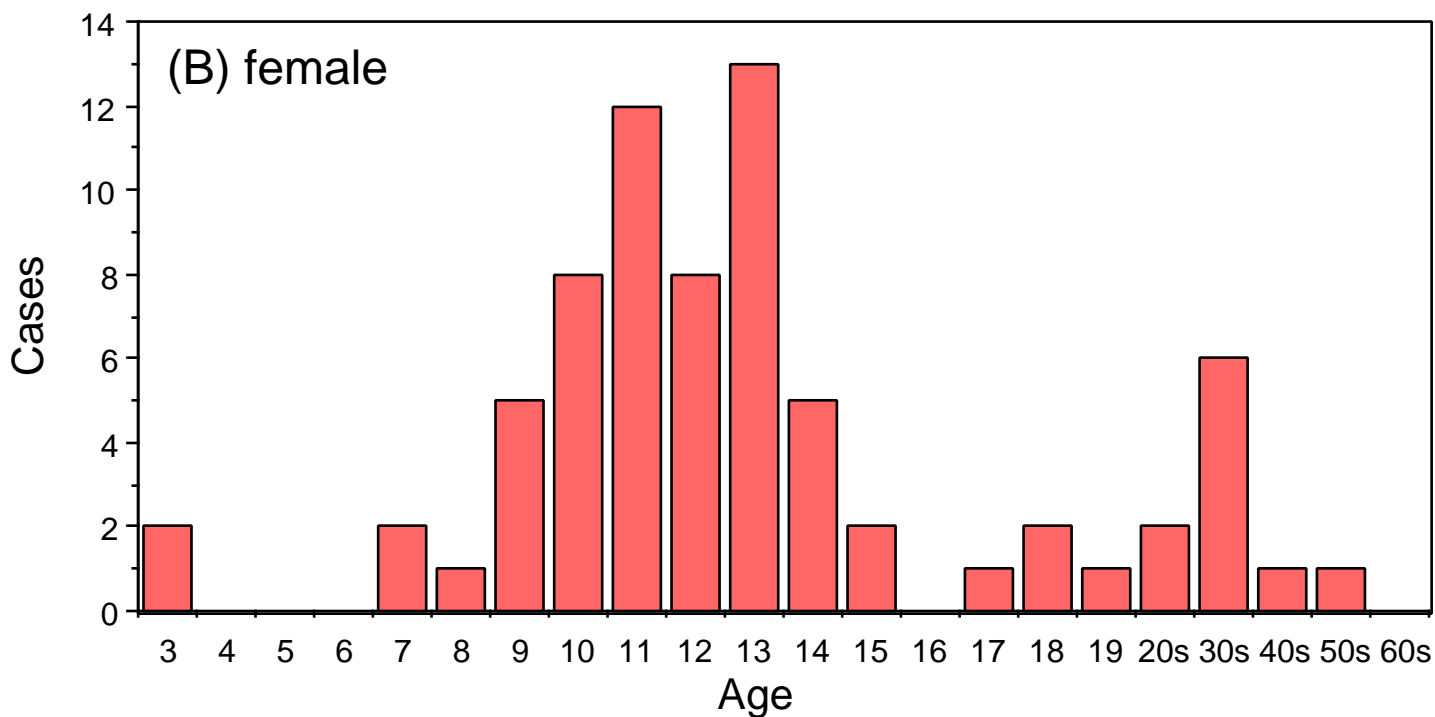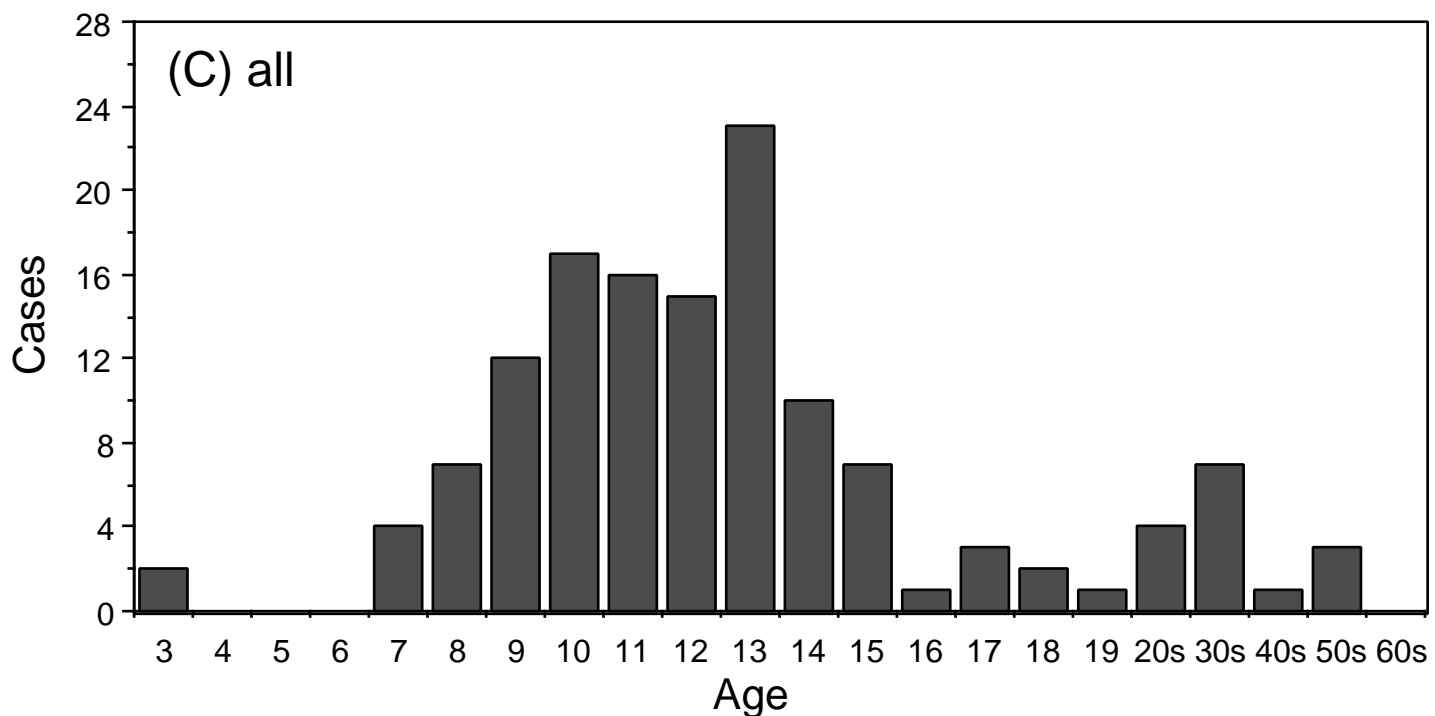

Supplement: MOESM1 [file 9644540]
